# Supplementary material for: Comparative Study of Pain-Related Responses of Male Piglets up to Seven Days of Age to the Application of Different Local Anaesthetics and Subsequent Castration
Source: MDPI journal article supplement (doi:10.3390/ani12202833), 2022-10-19
Supplement: s1 [file s1]

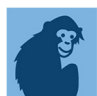

# Comparative study of pain-related responses of male piglets up to seven days of age to the application of different local anaesthetics and subsequent castration – supplementary material

Franz Josef Söbbeler <sup>1,\*a</sup>, Sören Wendt <sup>2,a</sup>, Andreas Briese <sup>3</sup>, Julia Tünsmeier<sup>1</sup>, Karl-Heinz Waldmann<sup>2†</sup>, Sabine Beate Rita Kästner<sup>1,b</sup>, Alexandra von Altrock <sup>2,\*,b</sup>

## Supplementary Data

### Respiratory rate

#### Response to Injection

Compared to baseline measurement respiratory rate increased statistically significantly after injection in all groups. No difference was seen between the groups (Table S1).

#### Response to castration

During castration, the maximum respiration rate was statistically significantly higher than the basal value in all groups. After castration, the highest increase of more than 10% compared to baseline was seen in M<sub>0.3</sub>, S<sub>0.3</sub> and S<sub>0.5</sub>. Group L<sub>0.5</sub> was the only group without a significant increase in respiratory rate postoperatively (Table S1).

### Mean arterial blood pressure

#### Response to Injection

Upon injection mean arterial blood pressure increased in all groups. Compared to intramuscular injection the change of MAP was statistically significant only in group P<sub>0.3</sub> and S<sub>0.5</sub> (Table S1).

#### Response to castration

Group L<sub>0.5</sub> and group M<sub>0.5</sub> were the only groups without significant increase in MAP during castration compared to baseline castration. In P<sub>0.5</sub> only a small increase was detected during emasculation. In all other groups the blood pressure started to increase significantly during emasculation and post operatively with the biggest increases in group M<sub>0.3</sub> and both placebo groups (Table S1).

**Table S1.** Mean and standard deviation of respiratory rate [breaths min<sup>-1</sup>], mean arterial blood pressure (MAP [mmHg]), and pulse rate [pulses min<sup>-1</sup>] for groups P<sub>0.3</sub>, P<sub>0.5</sub>, L<sub>0.3</sub>, L<sub>0.5</sub>, M<sub>0.3</sub>, M<sub>0.5</sub>, S<sub>0.3</sub>, S<sub>0.5</sub> and IM for the timepoints baseline Injection (BL-INJ), injection (INJ), baseline castration (BL-CA), castration (CA) and post castration (POST-CA). # represents a significant difference to baseline ( $p < 0.05$ ).

| parameter                                                           | group            | BL-INJ      | INJ-MAX       | BL-CA       | skin incision | exteriorization of testicles | emasculation  | CA-MAX        | POST-CA       |
|---------------------------------------------------------------------|------------------|-------------|---------------|-------------|---------------|------------------------------|---------------|---------------|---------------|
| respiratory rate<br>[breaths min <sup>-1</sup> ]<br>$\bar{x} \pm s$ | P <sub>0.3</sub> | 36,4 ± 9,9  | 39,9 ± 8,7 #  | 37,8 ± 10,7 | 38,1 ± 10,2   | 38,7 ± 10,0                  | 40,4 ± 10,2 # | 41,3 ± 10,1 # | 41,4 ± 10,7 # |
|                                                                     | P <sub>0.5</sub> | 32,6 ± 8,3  | 37,8 ± 7,2 #  | 32,4 ± 6,6  | 32,5 ± 6,8    | 33,0 ± 6,4 #                 | 34,2 ± 6,0 #  | 34,9 ± 6,1 #  | 33,2 ± 6,0 #  |
|                                                                     | L <sub>0.3</sub> | 32,1 ± 7,8  | 35,4 ± 8,2 #  | 31,6 ± 8,0  | 31,8 ± 8,2    | 32,6 ± 8,6 #                 | 33,6 ± 8,4 #  | 34,4 ± 8,3 #  | 32,8 ± 8,0 #  |
|                                                                     | L <sub>0.5</sub> | 30,7 ± 7,2  | 36,5 ± 7,5 #  | 30,1 ± 6,3  | 30,4 ± 6,5 #  | 30,7 ± 6,4 #                 | 31,5 ± 6,7 #  | 31,8 ± 6,9 #  | 30,5 ± 6,2    |
|                                                                     | M <sub>0.3</sub> | 35,1 ± 11,3 | 39,2 ± 10,6 # | 36,3 ± 12,0 | 36,6 ± 11,9   | 37,9 ± 11,9 #                | 39,6 ± 12,3 # | 40,6 ± 12,0 # | 42,3 ± 11,4 # |
|                                                                     | M <sub>0.5</sub> | 32,5 ± 6,2  | 36,5 ± 6,0 #  | 33,0 ± 6,4  | 33,2 ± 6,5    | 33,6 ± 6,6 #                 | 34,2 ± 6,7 #  | 35,0 ± 6,6 #  | 34,4 ± 6,6 #  |

|                                       |                 |                  |              |                |              |              |                |                |                |                |
|---------------------------------------|-----------------|------------------|--------------|----------------|--------------|--------------|----------------|----------------|----------------|----------------|
| MAP [mmHg]                            | $\bar{x} \pm s$ | S <sub>0.3</sub> | 32,6 ± 5,9   | 36,3 ± 6,1 #   | 34,0 ± 5,9   | 34,6 ± 5,7 # | 35,7 ± 6,6 #   | 37,1 ± 6,9 #   | 38,2 ± 6,8 #   | 39,9 ± 6,5 #   |
|                                       |                 | S <sub>0.5</sub> | 33,9 ± 7,1   | 39,5 ± 5,4 #   | 35,1 ± 7,5   | 35,6 ± 7,3 # | 37,8 ± 8,5 #   | 39,0 ± 7,7 #   | 39,8 ± 7,7 #   | 40,8 ± 6,3 #   |
|                                       |                 | IM               | 32,5 ± 5,0   | 34,9 ± 4,6 #   |              |              |                |                |                |                |
|                                       |                 | P <sub>0.3</sub> | 47,0 ± 5,2   | 54,9 ± 6,2 #   | 50,3 ± 5,5   | 50,9 ± 5,6 # | 50,9 ± 5,1     | 54,6 ± 6,6 #   | 61,6 ± 8,5 #   | 59,5 ± 8,1 #   |
|                                       |                 | P <sub>0.5</sub> | 47,0 ± 4,6   | 52,4 ± 6,3 #   | 45,9 ± 4,9   | 45,7 ± 4,7   | 45,4 ± 4,6     | 48,8 ± 5,8 #   | 50,0 ± 6,4 #   | 47,4 ± 5,2     |
|                                       |                 | L <sub>0.3</sub> | 46,9 ± 5,6   | 51,2 ± 6,0 #   | 46,8 ± 5,6   | 46,8 ± 5,7   | 46,6 ± 5,5     | 49,1 ± 6,9 #   | 50,9 ± 6,0 #   | 49,4 ± 5,8 #   |
|                                       |                 | L <sub>0.5</sub> | 48,3 ± 5,1   | 53,9 ± 6,1 #   | 47,1 ± 5,4   | 46,4 ± 4,9   | 46,6 ± 5,4     | 48,0 ± 5,6     | 48,9 ± 6,2 #   | 47,2 ± 6,3     |
|                                       |                 | M <sub>0.3</sub> | 49,8 ± 6,1   | 52,2 ± 5,3 #   | 50,0 ± 6,6   | 50,3 ± 6,4   | 49,5 ± 5,9     | 54,1 ± 6,0 #   | 60,0 ± 7,8 #   | 68,8 ± 10,9 #  |
|                                       |                 | M <sub>0.5</sub> | 50,6 ± 6,6   | 56,8 ± 7,2 #   | 51,6 ± 5,5   | 51,9 ± 5,1   | 51,3 ± 5,3     | 53,3 ± 5,6     | 54,8 ± 5,2 #   | 50,8 ± 5,3     |
|                                       |                 | S <sub>0.3</sub> | 50,1 ± 8,2   | 56,5 ± 8,7 #   | 50,8 ± 5,9   | 50,7 ± 5,8   | 51,5 ± 5,9     | 58,5 ± 10,1 #  | 64,0 ± 10,7 #  | 71,6 ± 9,5 #   |
|                                       |                 | S <sub>0.5</sub> | 47,9 ± 9,7   | 56,3 ± 10,1 #  | 49,3 ± 10,4  | 49,6 ± 10,1  | 51,1 ± 10,5    | 56,2 ± 13,1 #  | 61,6 ± 12,5 #  | 68,6 ± 13,7 #  |
|                                       |                 | IM               | 45,4 ± 7,7   | 46,7 ± 8,6 #   |              |              |                |                |                |                |
| Pulserate [Pulses min <sup>-1</sup> ] | $\bar{x} \pm s$ | P <sub>0.3</sub> | 171,0 ± 24,0 | 180,2 ± 25,6 # | 170,2 ± 24,4 | 170,0 ± 24,3 | 172,1 ± 25,2 # | 178,6 ± 26,3 # | 184,2 ± 28,8 # | 176,3 ± 24,8 # |
|                                       |                 | P <sub>0.5</sub> | 169,6 ± 20,5 | 184,5 ± 26,0 # | 160,5 ± 19,8 | 160,4 ± 20,1 | 160,7 ± 19,4   | 163,8 ± 19,6 # | 166,9 ± 21,5 # | 164,3 ± 20,1 # |
|                                       |                 | L <sub>0.3</sub> | 176,4 ± 19,5 | 182,6 ± 22,9 # | 174,4 ± 21,3 | 173,9 ± 20,8 | 173,7 ± 21,5   | 177,5 ± 23,9 # | 179,8 ± 23,4 # | 175,7 ± 21,7   |
|                                       |                 | L <sub>0.5</sub> | 180,5 ± 21,4 | 194,4 ± 25,3 # | 166,6 ± 18,7 | 166,7 ± 19,3 | 166,9 ± 19,6   | 167,1 ± 19,4   | 168,6 ± 19,7 # | 167,0 ± 19,5   |
|                                       |                 | M <sub>0.3</sub> | 172,9 ± 21,1 | 178,2 ± 21,7 # | 173,9 ± 22,2 | 174,1 ± 22,0 | 173,9 ± 21,4   | 184,2 ± 24,1 # | 190,6 ± 23,9 # | 177,0 ± 22,0 # |
|                                       |                 | M <sub>0.5</sub> | 182,1 ± 25,6 | 194,8 ± 29,4 # | 173,4 ± 24,6 | 173,8 ± 25,2 | 173,9 ± 24,8   | 175,5 ± 23,8   | 176,7 ± 25,0 # | 173,6 ± 25,7   |
|                                       |                 | S <sub>0.3</sub> | 180,4 ± 22,3 | 186,7 ± 22,9 # | 177,7 ± 20,2 | 178,5 ± 20,1 | 180,7 ± 20,9 # | 191,6 ± 24,3 # | 198,4 ± 23,3 # | 182,0 ± 21,2 # |
|                                       |                 | S <sub>0.5</sub> | 169,5 ± 25,6 | 180,1 ± 27,2 # | 168,9 ± 29,6 | 169,8 ± 28,9 | 171,2 ± 28,2   | 180,6 ± 32,0 # | 188,5 ± 31,9 # | 176,4 ± 28,7 # |
|                                       |                 | IM               | 181,6 ± 26,1 | 184,9 ± 28,3 # |              |              |                |                |                |                |

### Heart rate variability

#### Heart rate

##### Response to injection

Compared to baseline measurement a statistically significantly increase in heartrate upon injection was seen in groups M<sub>0.5</sub> and S<sub>0.5</sub> (Table S2).

##### Response to castration

A statistically significantly increase in heartrate during castration was seen in all groups except L<sub>0.5</sub> and M<sub>0.5</sub> whereas after castration heartrate of both procaine and both saline groups was still statistically significantly above baseline. In group L<sub>0.5</sub> heartrate decreases statistically significantly after castration (Table S2).

#### Mean RR-Interval

##### Response to injection

Compared to baseline measurement a statistically significant decrease in mean RR-intervals upon injection was seen in groups L<sub>0.5</sub> and S<sub>0.5</sub> (Table S2).

##### Response to castration

A statistically significant decrease in RR-intervals was noted during castration in all groups but L<sub>0.5</sub> and M<sub>0.5</sub>. Postoperatively both procaine and both saline groups showed a decrease in RR-intervals. A statistically significant increase in mean RR-intervals was seen after castration in group L<sub>0.5</sub> (Table S2).

#### SDHR and SDRR

##### Response to injection

The SDHR and the SDRR increased in all groups upon injection except L<sub>0.5</sub> and IM (Table S2).

##### Response to castration

During castration the SDHR and the SD RR increased in all groups but M<sub>0.5</sub> and after castration no statistically significant differences were seen compared to baseline in any group (Table S2).

### LF/HF-ratio

#### Response to injection

The LF/HF-ratio increased in all groups upon injection. The mildest increase (to 138% compared to baseline) was seen during intramuscular injection whereas the highest increase was seen during injection in group P<sub>0.5</sub> (1328%) (Table S2).

#### Response to castration

During castration a statistically significant increase was seen in all groups but M<sub>0.5</sub>. No significant differences were seen during the postoperative measurement period in any group (Table S2).

**Table S2.** Heart rate variability. Mean and standard deviation of heart rate [beat min<sup>-1</sup>], RR-Interval [ms], and median, minimum and maximum of Standard deviation of heart rate (SD HR [beat min<sup>-1</sup>]), Standard deviation of RR-Interval (SD RR [ms]) and Low Frequency High Frequency ratio (LF/HF-ratio) for groups P<sub>0.3</sub>, P<sub>0.5</sub>, L<sub>0.3</sub>, L<sub>0.5</sub>, M<sub>0.3</sub>, M<sub>0.5</sub>, S<sub>0.3</sub>, S<sub>0.5</sub> and IM for the timeperiods baseline Injection (BL-INJ<sup>e</sup>), injection (INJ<sup>e</sup>), baseline castration (BL-CA<sup>e</sup>), castration (CA<sup>e</sup>) and post castration (POST-CA<sup>e</sup>). # represents a significant difference to baseline ( $p < 0.05$ ).

| parameter                             | group               | BL-INJ <sup>e</sup> | INJ <sup>e</sup>    | BL-CA <sup>e</sup> | CA <sup>e</sup>      | POST-CA <sup>e</sup> |
|---------------------------------------|---------------------|---------------------|---------------------|--------------------|----------------------|----------------------|
| heart rate [beats min <sup>-1</sup> ] | $\bar{x} \pm s$     |                     |                     |                    |                      |                      |
|                                       | P <sub>0.3</sub>    | 179,1 ± 27,1        | 179,6 ± 26,7        | 177,0 ± 27,4       | 182,4 ± 27,8 #       | 183,9 ± 28,6 #       |
|                                       | P <sub>0.5</sub>    | 170,3 ± 25,7        | 172,5 ± 26,7        | 159,4 ± 23,1       | 162,2 ± 24,0 #       | 163,5 ± 24,1 #       |
|                                       | L <sub>0.3</sub>    | 177,4 ± 27,5        | 176,9 ± 26,0        | 174,6 ± 27,7       | 176,2 ± 28,1 #       | 175, ± 26,61         |
|                                       | L <sub>0.5</sub>    | 179,8 ± 20,6        | 182,4 ± 21,5        | 167,6 ± 18,6       | 166,8 ± 18,9         | 165,9 ± 19,1 #       |
|                                       | M <sub>0.3</sub>    | 177,2 ± 21,0        | 176,3 ± 19,7        | 176,4 ± 22,2       | 182,8 ± 21,4 #       | 178,8 ± 20,5         |
|                                       | M <sub>0.5</sub>    | 180,6 ± 25,1        | 182,8 ± 25,8 #      | 173,8 ± 24,4       | 174,5 ± 24,0         | 173,6 ± 24,8         |
|                                       | S <sub>0.3</sub>    | 180,9 ± 20,1        | 179,8 ± 17,6        | 178,7 ± 19,9       | 186,6 ± 20,9 #       | 182,2 ± 21,0 #       |
|                                       | S <sub>0.5</sub>    | 170,5 ± 24,3        | 173,4 ± 24,1 #      | 170,6 ± 26,4       | 178,4 ± 28,3 #       | 176,6 ± 26,4 #       |
|                                       | IM                  | 180,5 ± 23,8        | 180,5 ± 24,4        |                    |                      |                      |
| RR-interval [ms]                      | $\bar{x} \pm s$     |                     |                     |                    |                      |                      |
|                                       | P <sub>0.3</sub>    | 342,52 ± 53,17      | 341,35 ± 52,35      | 346,91 ± 54,03     | 336,55 ± 52,59 #     | 334,00 ± 52,37 #     |
|                                       | P <sub>0.5</sub>    | 362,47 ± 73,31      | 358,16 ± 72,02      | 386,02 ± 71,98     | 380,02 ± 74,26 #     | 376,99 ± 73,81 #     |
|                                       | L <sub>0.3</sub>    | 346,03 ± 53,28      | 346,32 ± 52,35      | 351,95 ± 55,78     | 348,80 ± 55,39 #     | 349,21 ± 51,63       |
|                                       | L <sub>0.5</sub>    | 338,26 ± 43,02      | 333,61 ± 42,57 #    | 362,64 ± 44,07     | 364,50 ± 45,19       | 366,71 ± 46,60 #     |
|                                       | M <sub>0.3</sub>    | 343,39 ± 42,78      | 344,64 ± 40,47      | 345,61 ± 46,02     | 332,81 ± 41,45 #     | 340,12 ± 41,41       |
|                                       | M <sub>0.5</sub>    | 338,99 ± 51,49      | 334,90 ± 50,75      | 352,43 ± 54,20     | 350,90 ± 53,91       | 353,20 ± 55,92       |
|                                       | S <sub>0.3</sub>    | 335,15 ± 33,24      | 336,63 ± 30,71      | 339,40 ± 34,50     | 325,18 ± 34,83       | 333,26 ± 36,07 #     |
|                                       | S <sub>0.5</sub>    | 359,95 ± 60,19      | 353,73 ± 59,73 #    | 361,90 ± 71,95     | 346,57 ± 70,31 #     | 349,19 ± 68,41 #     |
|                                       | IM                  | 338,34 ± 47,87      | 338,58 ± 48,96      |                    |                      |                      |
| SD HR [beats min <sup>-1</sup> ]      | $\sim x$ (Min; Max) |                     |                     |                    |                      |                      |
|                                       | P <sub>0.3</sub>    | 0,65 (0,47; 1,65)   | 1,06 (0,71; 2,17) # | 0,7 (0,46; 1,73)   | 1,42 (0,84; 2,94) #  | 0,74 (0,47; 1,49)    |
|                                       | P <sub>0.5</sub>    | 0,61 (0,33; 1,25)   | 1,16 (0,40; 2,46) # | 0,62 (0,26; 1,11)  | 1,07 (0,26; 2,64) #  | 0,66 (0,22; 0,99)    |
|                                       | L <sub>0.3</sub>    | 0,71 (0,48; 1,06)   | 0,91 (0,55; 2,56) # | 0,7 (0,46; 1,63)   | 1,3 (0,51; 1,97) #   | 0,77 (0,42; 1,39)    |
|                                       | L <sub>0.5</sub>    | 0,83 (0,07; 2,48)   | 1,05 (0,67; 2,63)   | 0,62 (0,37; 1,35)  | 0,86 (0,42; 2,43) #  | 0,65 (0,40; 1,02)    |
|                                       | M <sub>0.3</sub>    | 0,77 (0,45; 1,54)   | 1,03 (0,51; 1,82) # | 0,86 (0,45; 1,31)  | 1,87 (1,21; 5,56) #  | 0,85 (0,52; 1,28)    |
|                                       | M <sub>0.5</sub>    | 0,74 (0,41; 1,32)   | 0,94 (0,56; 1,77) # | 0,78 (0,47; 1,35)  | 0,89 (0,47; 2,46)    | 0,77 (0,44; 1,84)    |
|                                       | S <sub>0.3</sub>    | 0,76 (0,06; 1,05)   | 1,02 (0,56; 2,31) # | 0,77 (0,48; 1,09)  | 2,07 (0,83; 6,87) #  | 0,87(0,48; 1,60)     |
|                                       | S <sub>0.5</sub>    | 0,63 (0,35; 1,62)   | 0,97 (0,41; 2,18) # | 0,73 (0,37; 1,24)  | 1,91 (0,74; 3,42) #  | 0,81 (0,43; 1,61)    |
|                                       | IM                  | 0,63 (0,40; 3,04)   | 0,74 (0,37; 1,37)   |                    |                      |                      |
| SDNN [ms]                             | $\sim x$ (Min; Max) |                     |                     |                    |                      |                      |
|                                       | P <sub>0.3</sub>    | 1,51 (0,87; 3,01)   | 2,12 (1,34; 3,24) # | 1,53 (0,90; 2,38)  | 3,07 (1,55; 4,32) #  | 1,3 (0,80; 3,02)     |
|                                       | P <sub>0.5</sub>    | 1,24 (0,90; 2,11)   | 2,3 (1,19; 4,73) #  | 1,51 (0,95; 4,42)  | 2,26 (0,96; 5,12) #  | 1,5 (0,98; 2,44)     |
|                                       | L <sub>0.3</sub>    | 1,33 (0,86; 3,22)   | 1,81 (0,77; 3,68) # | 1,49 (0,75; 3,00)  | 2,41 (0,96; 4,67) #  | 1,43 (0,76; 3,66)    |
|                                       | L <sub>0.5</sub>    | 1,75 (1,06; 5,53)   | 2,05 (1,10; 4,06)   | 1,35 (0,86; 2,67)  | 1,71 (0,96; 3,85) #  | 1,51 (0,86; 2,29)    |
|                                       | M <sub>0.3</sub>    | 1,54 (0,79; 2,39)   | 1,81 (0,89; 3,42) # | 1,56 (0,90; 2,72)  | 4,03 (1,85; 8,76) #  | 1,53 (1,03; 2,49)    |
|                                       | M <sub>0.5</sub>    | 1,15 (0,85; 2,55)   | 1,66 (1,12; 2,77) # | 1,55 (0,95; 2,74)  | 1,68 (0,96; 5,67)    | 1,52 (0,92; 3,57)    |
|                                       | S <sub>0.3</sub>    | 1,38 (0,83; 2,14)   | 1,9 (1,12; 4,60) #  | 1,46 (1,06; 2,06)  | 3,26 (1,66; 12,10) # | 1,6 (0,91; 2,37)     |

|             |               |                        |                   |                      |                    |                      |                    |
|-------------|---------------|------------------------|-------------------|----------------------|--------------------|----------------------|--------------------|
| LF/HF-ratio | ~x (Min; Max) | <b>S<sub>0.5</sub></b> | 1,31 (0,87; 2,93) | 2,05 (1,00; 4,73) #  | 1,35 ( 0,90; 7,68) | 3,25 (1,23; 11,36) # | 1,6 (0,90; 6,70)   |
|             |               | <b>IM</b>              | 1,22 (0,93; 3,50) | 1,39 (0,87; 2,10)    |                    |                      |                    |
|             |               | <b>P<sub>0.3</sub></b> | 0,11 (0,01; 7,37) | 0,96 (0,05; 4,69) #  | 0,22 (0,01; 10,32) | 2,42 (0,53; 8,83) #  | 0,21 (0,04; 1,85)  |
|             |               | <b>P<sub>0.5</sub></b> | 0,07 (0,01; 0,49) | 0,93 (0,07; 7,83) #  | 0,11 (0,00; 1,33)  | 0,66 (0,01; 16,71) # | 0,17 (0,02; 0,77)  |
|             |               | <b>L<sub>0.3</sub></b> | 0,1 (0,01; 1,62)  | 0,56 (0,05; 2,25) #  | 0,1 (0,02; 0,90)   | 0,96 (0,04; 7,79) #  | 0,14 (0,03; 4,53)  |
|             |               | <b>L<sub>0.5</sub></b> | 0,1 (0,02; 3,42)  | 0,62 (0,14; 13,07) # | 0,06 (0,02; 1,15)  | 0,09 (0,03; 23,44) # | 0,08 (0,01; 0,69)  |
|             |               | <b>M<sub>0.3</sub></b> | 0,1 (0,01; 1,56)  | 0,56 (0,08; 2,43) #  | 0,16 (0,02; 1,63)  | 4,36 (0,63; 18,59) # | 0,29 (0,04; 1,76)  |
|             |               | <b>M<sub>0.5</sub></b> | 0,07 (0,01; 1,22) | 0,32 (0,06; 2,08) #  | 0,07 (0,02; 3,06)  | 0,22 (0,01; 24,97)   | 0,09 (0,01; 13,99) |
|             |               | <b>S<sub>0.3</sub></b> | 0,13 (0,01; 0,65) | 0,85 (0,03; 9,52) #  | 0,24 (0,01; 1,52)  | 5,28 (0,04; 45,42) # | 0,48 (0,07; 2,87)  |
|             |               | <b>S<sub>0.5</sub></b> | 0,08 (0,00; 1,37) | 1,05 (0,09; 6,49) #  | 0,15 (0,04; 1,05)  | 3,47 (0,36; 26,48) # | 0,22 (0,09; 1,41)  |
|             |               | <b>IM</b>              | 0,13 (0,02; 0,60) | 0,18 (0,04; 2,18) #  |                    |                      |                    |
